# Supplementary material for: Drp1 Controls Effective T Cell Immune-Surveillance by Regulating T Cell Migration, Proliferation, and cMyc-Dependent Metabolic Reprogramming
Source: PubMed Central journal article supplement — Cell Rep. 2018 Dec 11;25(11):3059–3073.e10. doi: 10.1016/j.celrep.2018.11.018 (PMC6302735; doi:10.1016/j.celrep.2018.11.018), 2018-12-11
Supplement: mmc1.pdf [file mmc1.pdf]

**Cell Reports, Volume 25**

**Supplemental Information**

**Drp1 Controls Effective T Cell Immune-Surveillance  
by Regulating T Cell Migration, Proliferation,  
and cMyc-Dependent Metabolic Reprogramming**

**Luca Simula, Ilenia Pacella, Alessandra Colamatteo, Claudio Procaccini, Valeria Cancila, Matteo Bordi, Claudia Tregnago, Mauro Corrado, Martina Pigazzi, Vincenzo Barnaba, Claudio Tripodo, Giuseppe Matarese, Silvia Piconese, and Silvia Campello**

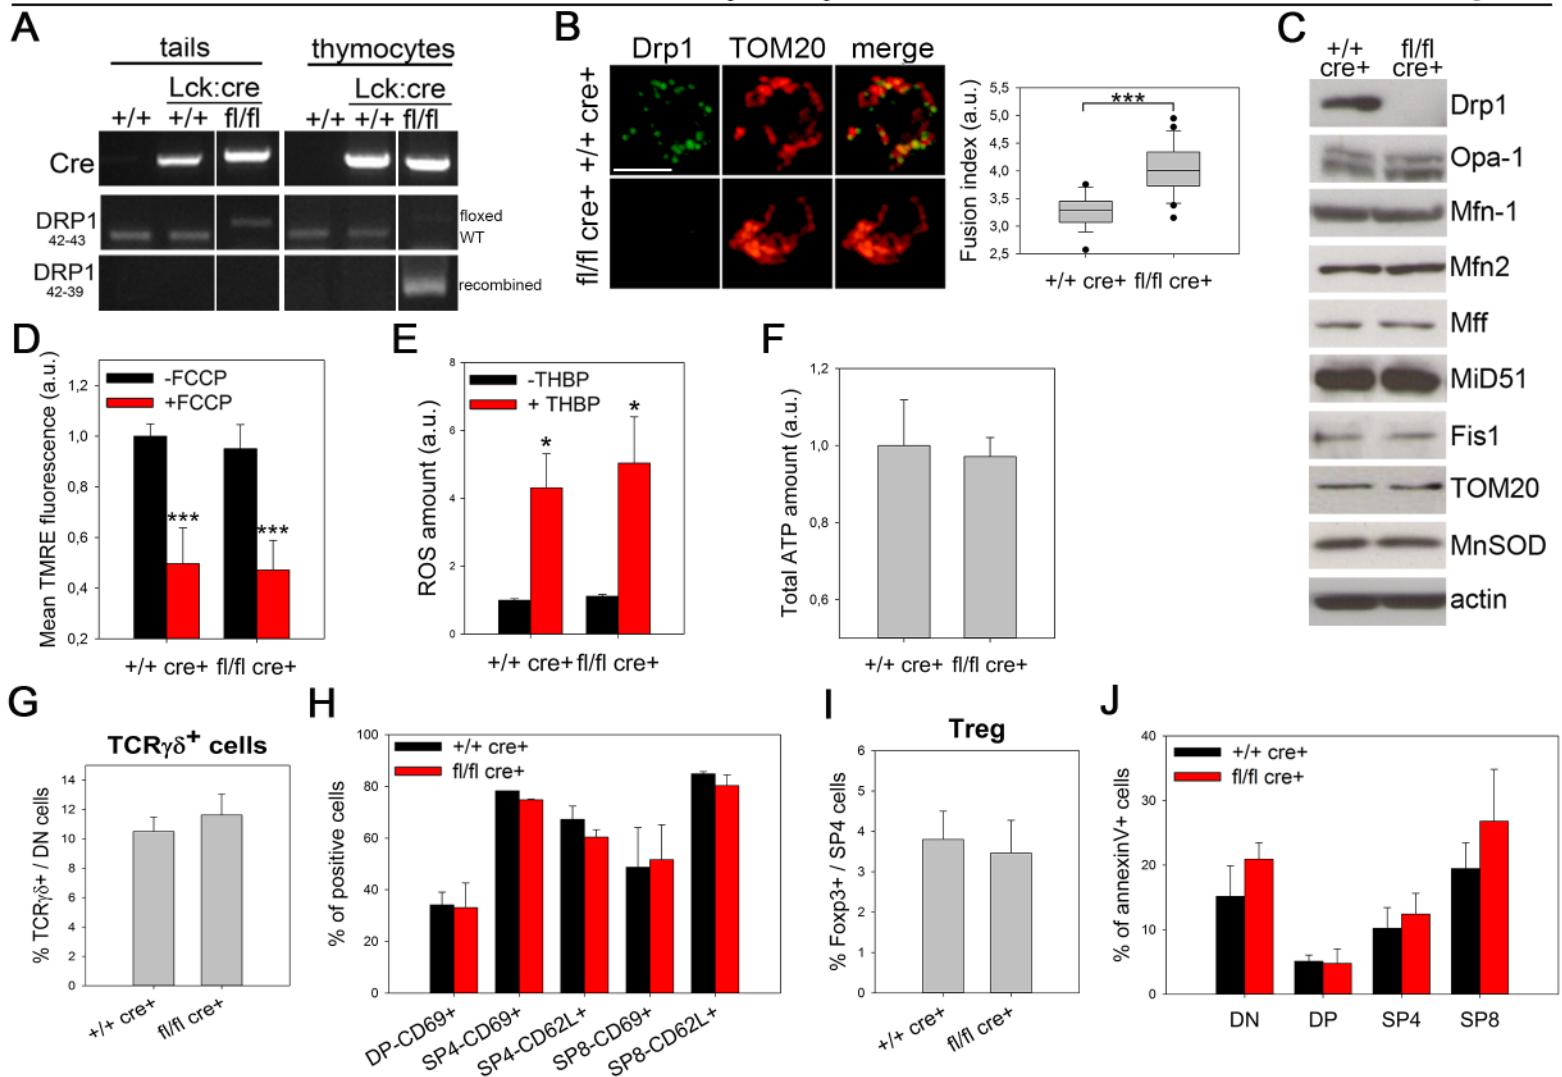

mature T cells

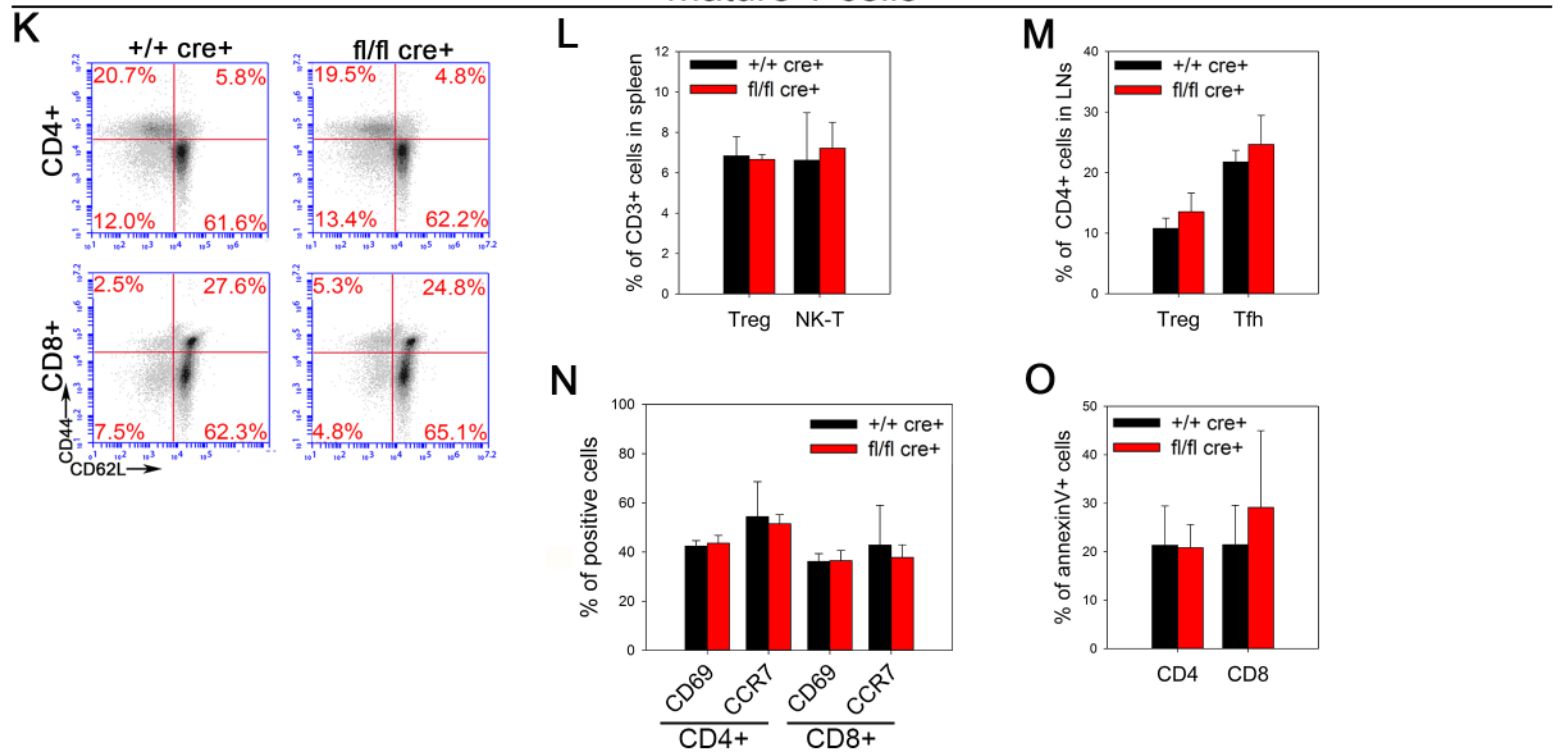

**Supplemental Figure 1. Tissue specific deletion of Drp1 protein in T cell lineage impairs thymocyte mitochondrial fragmentation but does not interfere with the cell type relative distribution in primary or secondary lymphoid organs. Related to Figure 1.**

(A) PCR genotyping of *+/+ cre+* control and *fl/fl cre+* Drp1 KO mice (n=3). Note that the thymocytes and the tails were run on separate gels. (B) z-stack reconstruction of confocal images of mitochondria (TOM20, in red) and Drp1 (in green) expression in *+/+ cre+* control and *fl/fl cre+* Drp1 KO thymocytes. Quantification of mitochondrial morphology by fusion index is reported in the graph (at least 90 cells from three mice per group) (n=3). (C) Western Blot analysis of mitochondrial shaping proteins and mitochondrial markers levels in *+/+ cre+* control and *fl/fl cre+* Drp1 KO thymocytes (Drp1, Mfn1 n=7; Opa-1, n=4; TOM20, MnSOD, n=6; Mfn2, MiD51, Mff, Fis1, n=3). (D) Measurement of mitochondrial potential ( $\Delta\psi$ ) by mean TMRE fluorescence in *+/+ cre+* control and *fl/fl cre+* Drp1 KO thymocytes. FCCP has been used as positive control for  $\Delta\psi$  depolarization (n=5). (E) Flow cytometric measurement of ROS amounts (DCFDA mean fluorescence index) in *+/+ cre+* control and *fl/fl cre+* Drp1 KO thymocytes. TBHP has been used as positive control for ROS production (n=5). (F) Total ATP amounts in *+/+ cre+* control and *fl/fl cre+* Drp1 KO thymocytes (n=5). (G, H, I and J) Cytofluorimetric measurement of the percentage of DN TCR $\gamma\delta^+$  (G, n=4), CD69 $^+$  and CD62L $^+$  cells (H, n=3), SP4 Treg cells (I, n=3) and annexin V $^+$  subsets (J, n=4) in *+/+ cre+* control and *fl/fl cre+* Drp1 KO thymocytes. (K) Cytofluorimetric measurement of the percentage of CD4 $^+$  and CD8 $^+$  subsets according to CD62L and CD44 expression in *+/+ cre+* control and *fl/fl cre+* Drp1 KO T cells (n=6). (L) Cytofluorimetric measurement of the percentage of Treg and Natural Killer T (NK-T) cells in *+/+ cre+* control and *fl/fl cre+* Drp1 KO CD3 $^+$  T cells isolated from spleen (B, n=3). (M) Cytofluorimetric measurement of the percentage of Treg (n=3) and CD4 $^+$  CXCR5 $^+$ PD1 $^+$  T follicular helper cells (Tfh) (n=3) in *+/+ cre+* control and *fl/fl cre+* Drp1 KO CD4 $^+$  T cells in lymph node pool. (N) Cytofluorimetric measurement of the percentage of CCR7 $^+$  and CD69 $^+$  cells in *+/+ cre+* control and *fl/fl cre+* Drp1 KO CD4 $^+$  and CD8 $^+$  T cells isolated from lymph node pool. (O) Percentage of annexinV $^+$  cells in *+/+ cre+* control and *fl/fl cre+* Drp1 KO CD4 $^+$  and CD8 $^+$  T cells isolated from spleen (n=6). Data are represented as mean  $\pm$  SEM. Scale bar, 10 $\mu$ m. Significance is indicated as follows: \*= $p < 0.05$ , \*\*\*= $p < 0.001$ .

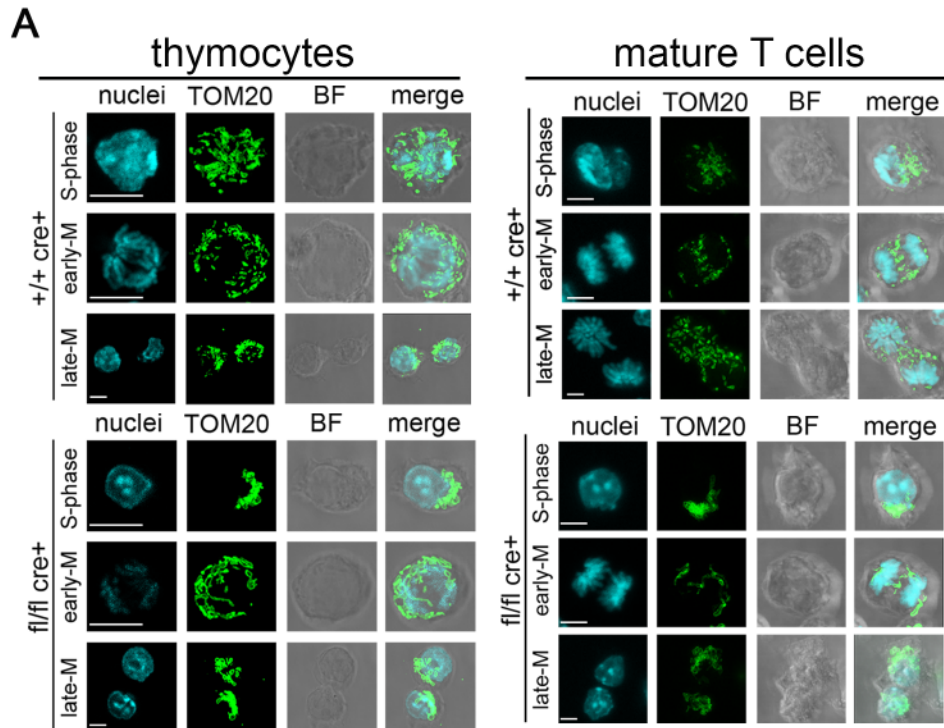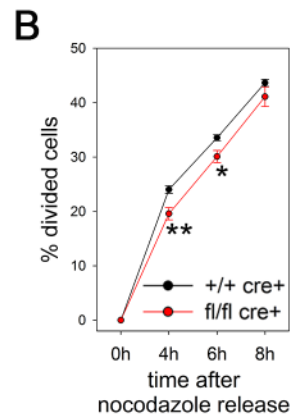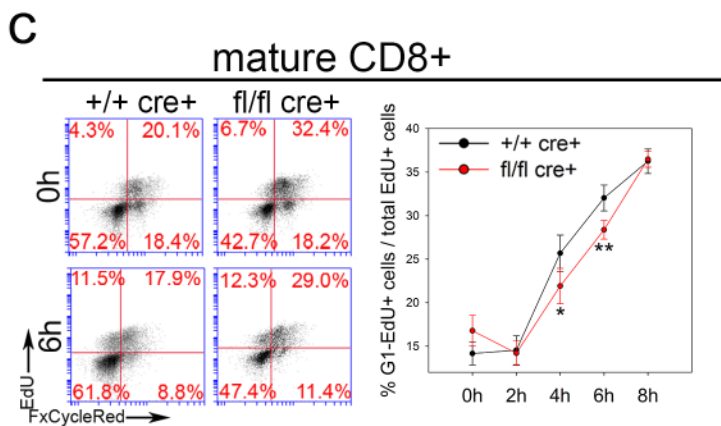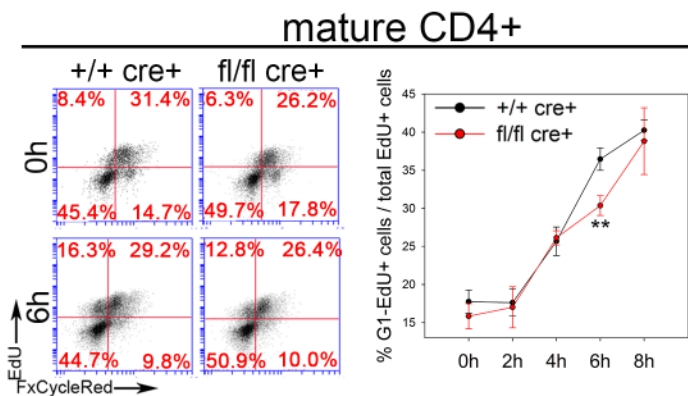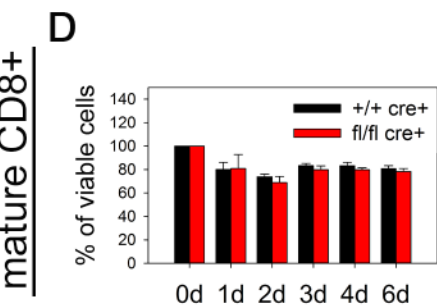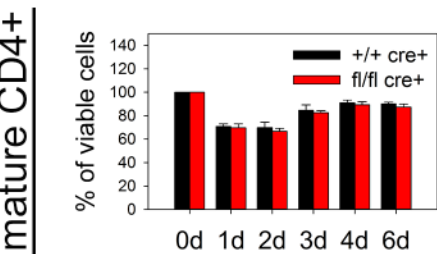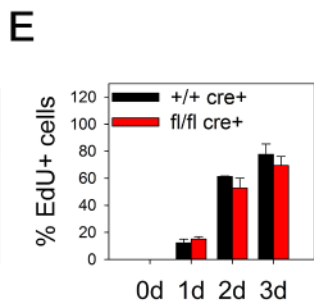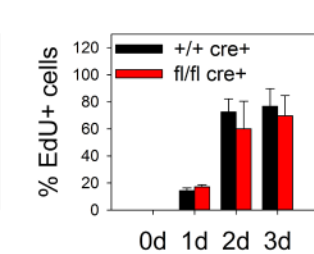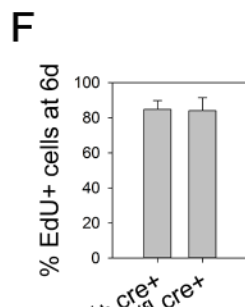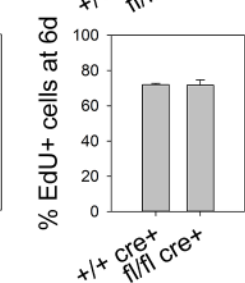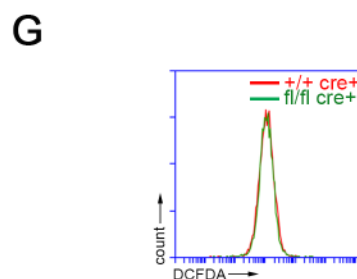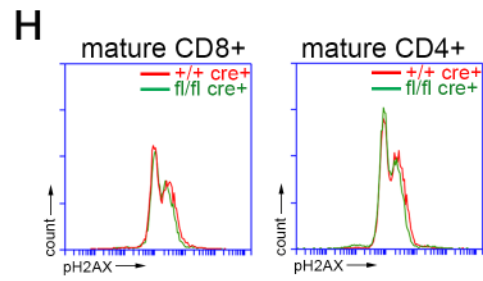

**Supplemental Figure 2. Further analysis of proliferation in thymocytes and mature T cells. Related to Figure 2.**

(A) z-stack reconstruction of confocal images of mitochondrial (TOM20, in green) morphology in *+/+* cre<sup>+</sup> control and fl/fl cre<sup>+</sup> Drp1 KO thymocytes stimulated with PHA and IL2 for 3 days (n=3) or in control and Drp1 KO CD4<sup>+</sup> T cells after 6 days of *in vitro* activation (n=3) during different phases of cell cycle. (B) Release from o.n. nocodazole block for CFSE stained thymocytes pre-activated *in vitro* for 3 days. Percentage of divided cells (halving of CFSE mean fluorescence) for each indicated time point is shown in the graph (n=4 ctrl, n=5 KO). (C) Analysis of EdU incorporation and DNA content (FxCycle Red staining) in *in vitro*-activated CD8<sup>+</sup> (n=7) and CD4<sup>+</sup> (n=5) T cells, after 30min EdU pulse. Quantification of EdU<sup>+</sup> cells (%) with G1 DNA content among the total EdU<sup>+</sup> cells is shown in the graphs. (D) Percentage of annexinV<sup>-</sup> CD8<sup>+</sup> and CD4<sup>+</sup> *+/+* cre<sup>+</sup> control and fl/fl cre<sup>+</sup> Drp1 KO T cells during 6 days of *in vitro* activation (n=5). (E) Cytofluorimetric measurement of the percentage of proliferating cells after 2h EdU pulse given to *+/+* cre<sup>+</sup> control and fl/fl cre<sup>+</sup> Drp1 KO CD8<sup>+</sup> and CD4<sup>+</sup> T cells at 0-1-2-3 days after *in vitro* activation (n=2). (F) Cytofluorimetric measurement of the percentage of proliferating cells after 24h EdU pulse given to *+/+* cre<sup>+</sup> control and fl/fl cre<sup>+</sup> Drp1 KO CD8<sup>+</sup> and CD4<sup>+</sup> T cells 6 days after *in vitro* activation (n=3). (G) ROS amounts measured as DCFDA fluorescence in *+/+* cre<sup>+</sup> and fl/fl cre<sup>+</sup> Drp1 KO CD3<sup>+</sup> T cells 6 days after *in vitro* stimulation (n=3). (H) Percentage of *+/+* cre<sup>+</sup> and fl/fl cre<sup>+</sup> Drp1 KO CD8<sup>+</sup> and CD4<sup>+</sup> T cells positive for phospho-H2AX flow-cytometric staining 6 days after *in vitro* stimulation (n=3). Data are represented as mean ± SEM. Scale bar, 5µm. Significance is indicated as follows: \*= $p < 0.05$ , \*\*= $p < 0.01$ .

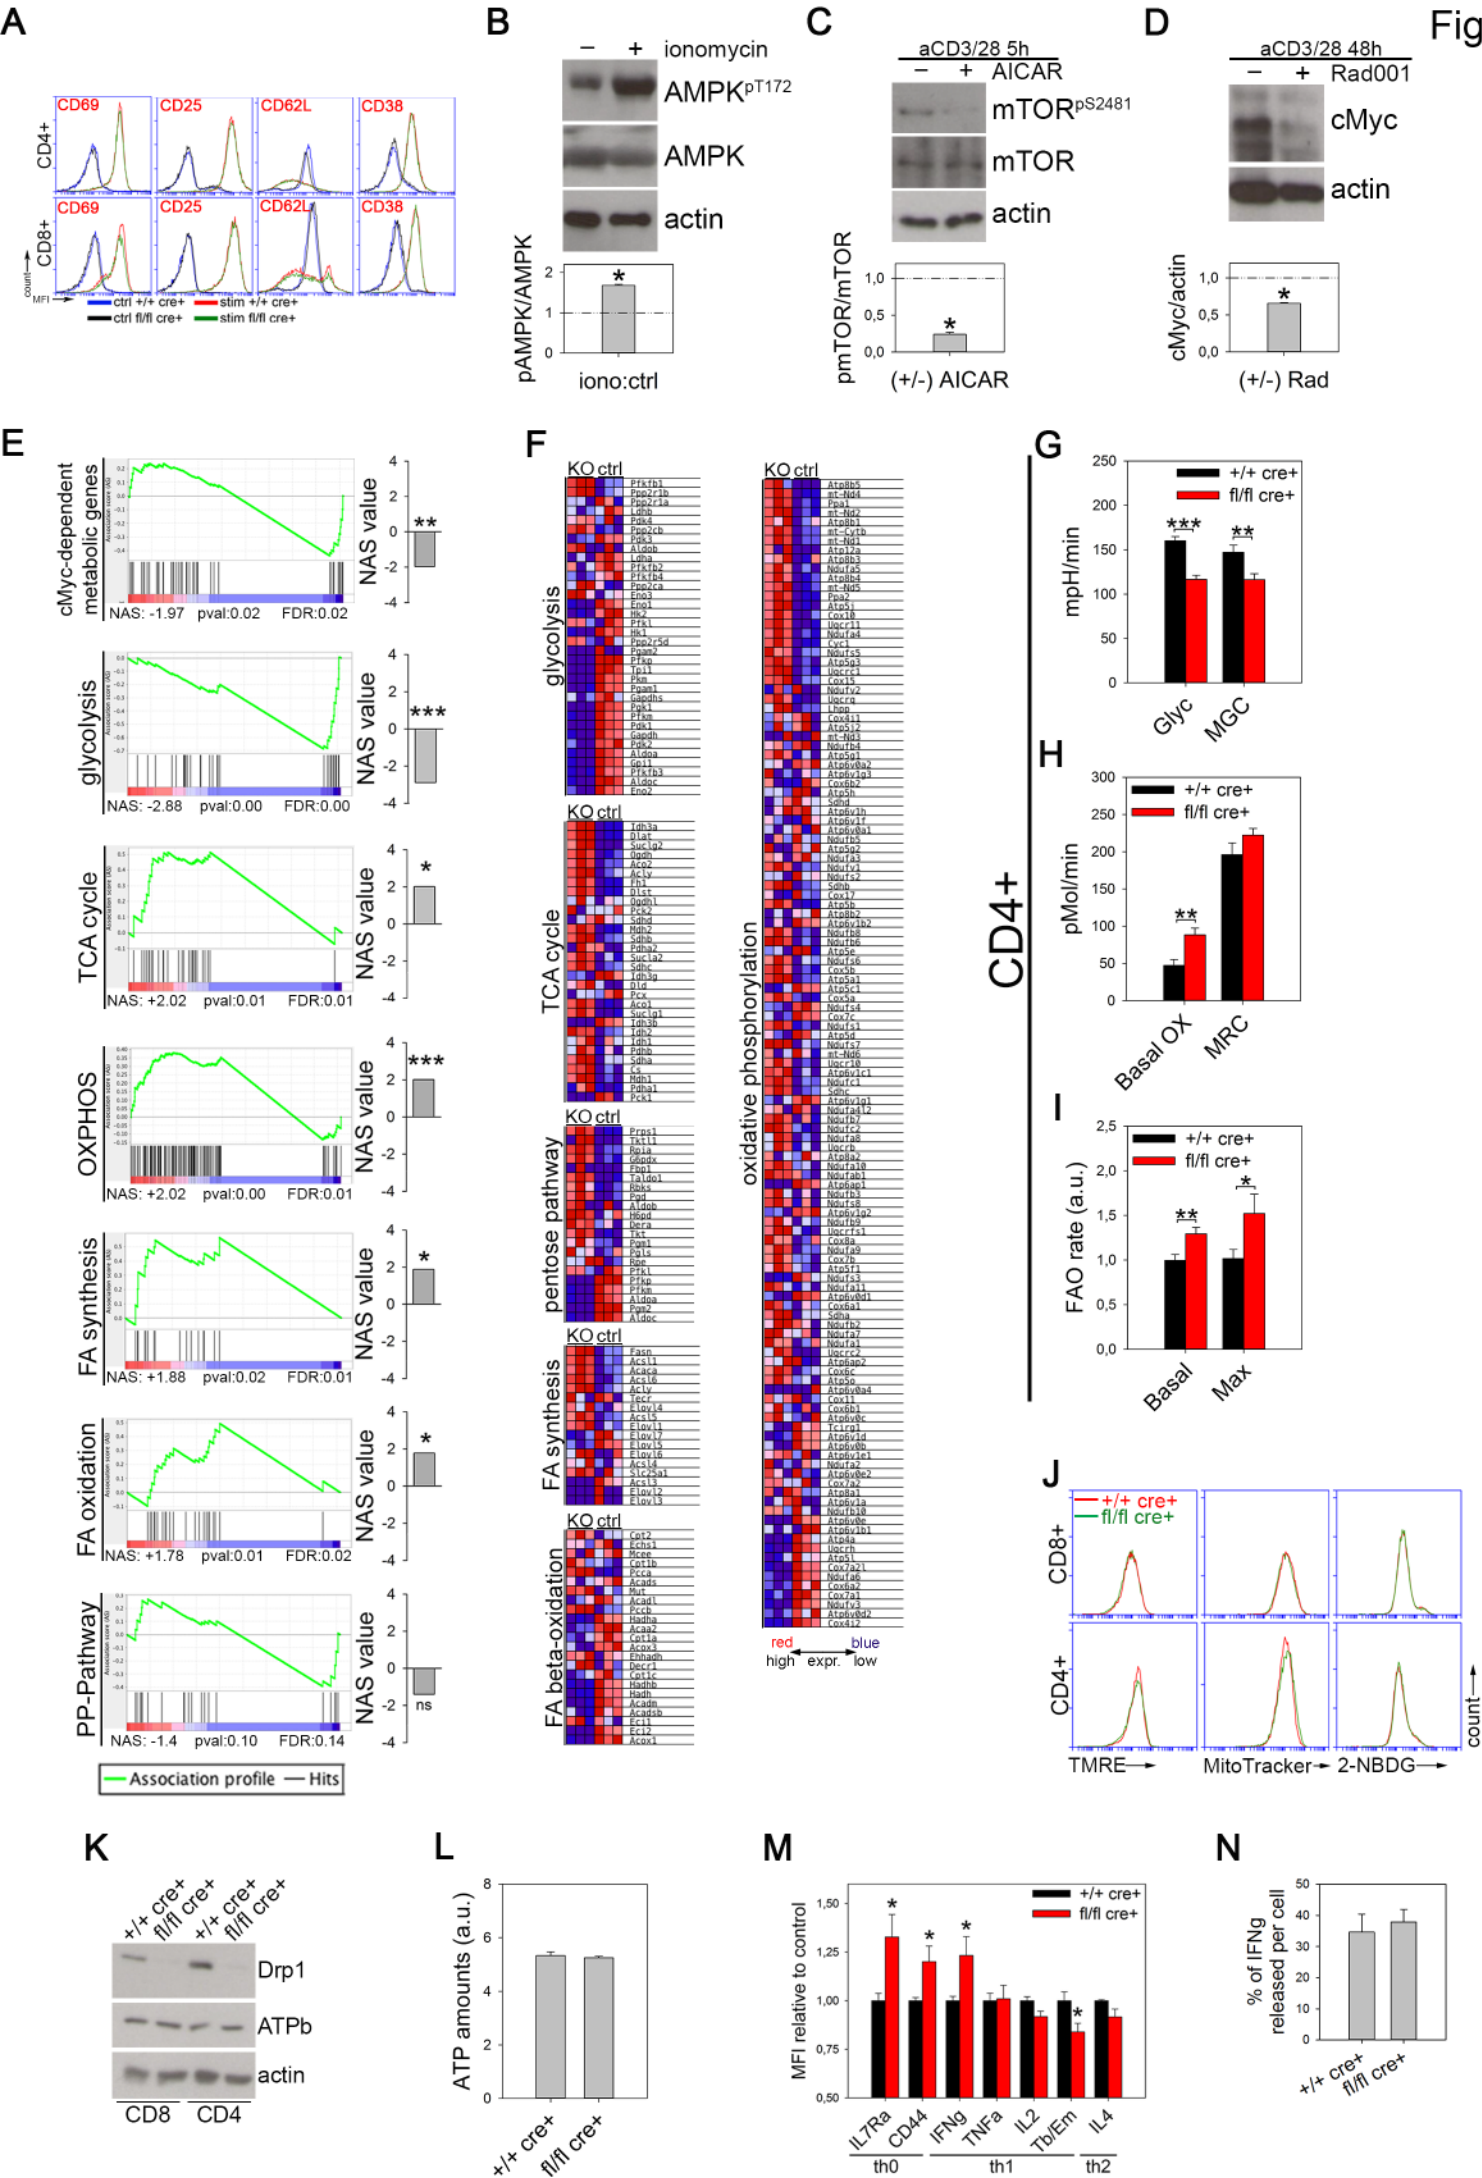

### Supplemental Figure 3. Further analysis of metabolic reprogramming in mature T cells. Related to Figure 3.

(A) Expression profile of CD69, CD62L (control: day zero; stimulated: day one), CD38 and CD25 (control: day zero; stimulated: day two) for *in vitro* activated T cells (n=3). (B-C-D) Western blot analysis of the indicated (phospho)-protein levels from wild-type T cells stimulated *in vitro* with ionomycin for 1h (B, n=3), aCD3 plate-coated plus CD28/IL2, with or without AICAR for 5h (C, n=3) or Rad-001 for 48h (D, n=3). (E-F) *+/+* cre+ control and fl/fl cre+ Drp1 KO T cells have been activated for 3 days *in vitro* and then processed for RNA seq. GSAA enrichment plot of the expression level of the indicated group of genes (E) and corresponding raw heatmap data (F). See also Supplemental Table. Related to Fig. 3F-G (NAS: normalized association score; pval=normalized p-value; FDR: false discovery rate) (n=3). (G-H-I) Seahorse analysis of ECAR (G) and OCR (H-I) values in *+/+* cre+ control and fl/fl cre+ Drp1 KO CD4+ T cells 6 days after *in vitro* activation (2-DG: 2-deoxyglucose; Rot/an; Rotenone/antimycin). For evaluation of fatty acid oxidation, OCR rate has been measured with BSA-palmitate, with or without etomoxir (I). The following parameters have been quantified: glycolysis(Glyc), maximal glycolytic capacity (MGC); basal OXPHOS (Basal OX), maximum respiratory capacity (MRC), basal (Basal) and maximal (Max) fatty acid oxidation. (n=3). (J) Measurement of the Mean fluorescence index (MFI) for Mitotracker, TMRE and 2-NBDG in *+/+* cre+ control and fl/fl cre+ Drp1 KO T cells 6 days after *in vitro* activation (Mitotracker, TMRE n=6; 2-NBDG, n=4). (K) Western blot analysis of the mitochondrial marker ATPb expression in *+/+* cre+ control and fl/fl cre+ Drp1 KO T cells 6 days after *in vitro* activation (n=2). (L) Total ATP amounts in *+/+* cre+ control and fl/fl cre+ Drp1 KO CD3+ T cells 6 days after *in vitro* activation (n=3). (M) Cytofluorimetric measurements of the Mean fluorescence index (MFI) for IL7Ra (n=11), CD44 (n=8), KLRG1 (n=9), IFN $\gamma$  (n=10), TNF $\alpha$  (n=6), IL2 (n=4), IL4 (n=7) and for the Tbet:Eomes MFIs ratio (n=8) in *+/+* cre+ control and fl/fl cre+ Drp1 KO CD4+ splenic T cells upon 6 days of *in vitro* activation under the indicated polarizing conditions (see Materials and Methods for details). (N) Percentage of IFN $\gamma$  released by *+/+* cre+ control and fl/fl cre+ Drp1 KO CD8+ T cells after *in vitro* re-stimulation with a-CD3/CD28 antibodies 6d after initial activation (n=3). The following formula has been applied: [(IFN $\gamma$  mean fluorescence index, MFI, with monensin) - (IFN $\gamma$  MFI without monensin)] / (IFN $\gamma$  MFI with monensin).

Data are represented as mean  $\pm$  SEM. Significance is indicated as follows: \* = p < 0.05, \*\* = p < 0.01, \*\*\* = p < 0.001.

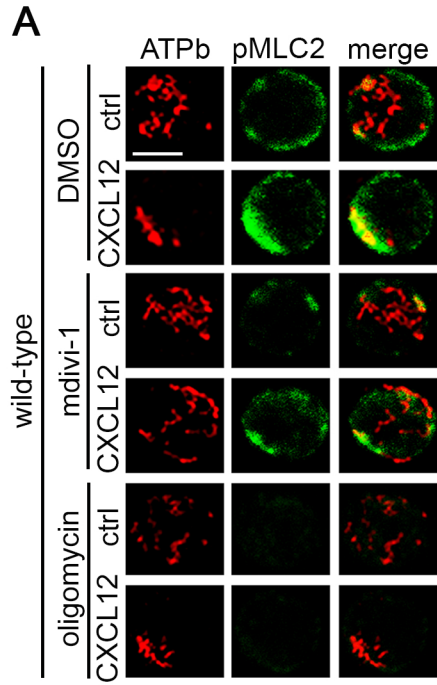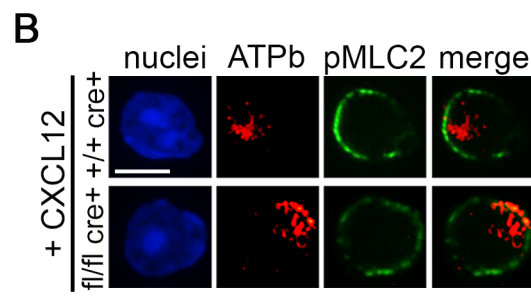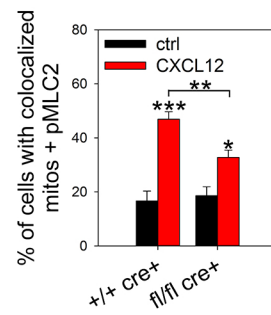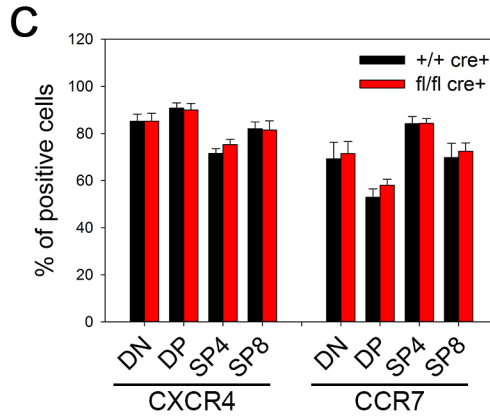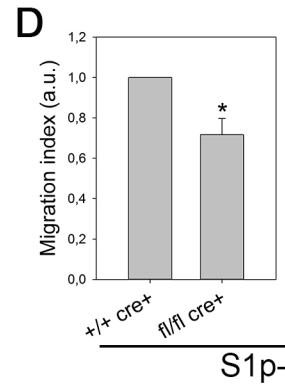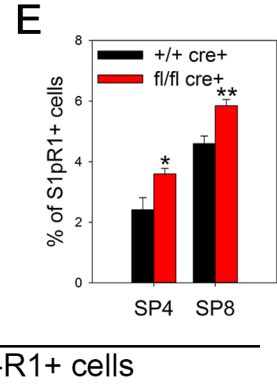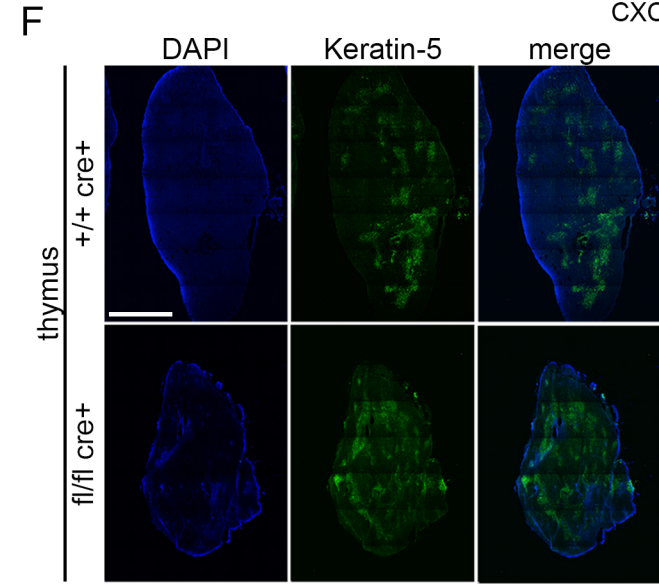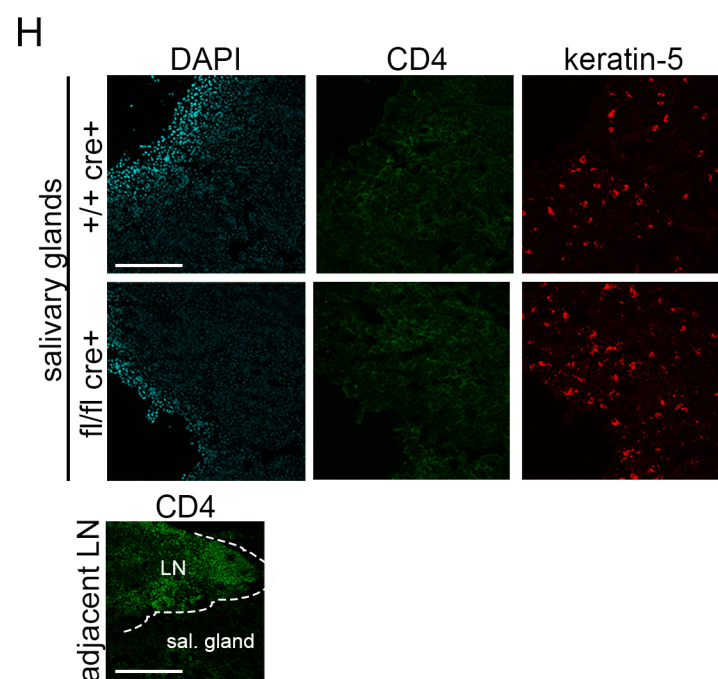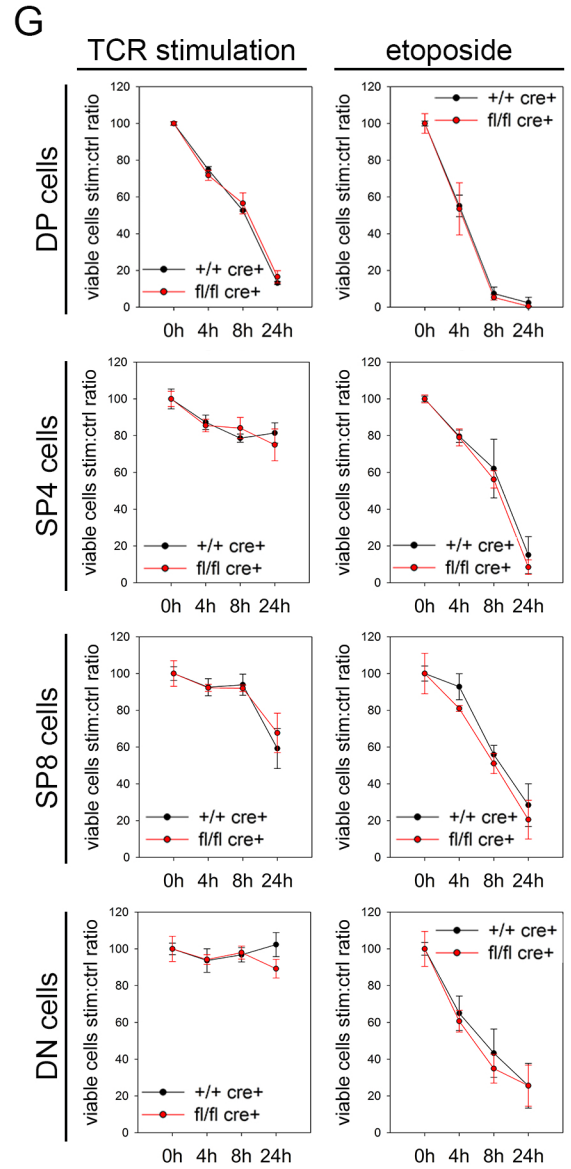



**Supplemental Figure 4. Further analysis of migration in thymocytes. Drp1 conditional KO mice show reduction in medullary islets' mean area, increased TUNEL+ cell density not dependent on a differential apoptotic response and absence of autoreactive T infiltrates into salivary glands. Related to Figure 4.**

(A) z-stack reconstruction of confocal images of mitochondria (ATPb, in red) and phospho-MLC2 (in green) in wild type thymocytes treated with DMSO, mdivi-1 or oligomycin and then stimulated with 50nM CXCL12 (n=6). (B) z-stack reconstruction of confocal images of mitochondria (ATPb, in red) and pMLC2 (in green) localization in +/+ cre+ control and fl/fl cre+ Drp1 KO thymocytes stimulated with 50nM CXCL12. The percentage of cells with colocalizing mitochondria and pMLC2 is reported in the graph (n=8). (C) Cytofluorimetric analysis of the percentage of cells positive for CCR7 or CXCR4 in +/+ cre+ control and fl/fl cre+ Drp1 KO thymocyte subsets (n=3). (D and E) Cytofluorimetric analysis of the percentage of S1p-R1<sup>+</sup> cells (d, n=4) and transwell migration assay in presence of 100nM S1p (e, n=4) for +/+ cre+ control and fl/fl cre+ Drp1 KO single positive thymocytes. (F) Quantification of the ratio between mean medullary islets (Keratin-5<sup>+</sup>) section area and thymus area in +/+ cre+ control and fl/fl cre+ Drp1 KO thymic sections (n=5). z-stack reconstruction of confocal images for Keratin-5 expression. (G) Quantification of the stimulated:control viability ratio in +/+ cre+ control and fl/fl cre+ Drp1 KO thymocyte subsets stimulated *in vitro* with anti-TCR $\beta$ /CD28/CD2 antibodies (n=4) or with 50 $\mu$ M etoposide (n=4) for the indicated time. (H) Salivary gland sections from +/+ cre+ control and fl/fl cre+ Drp1 KO mice immunostained with anti-CD4 (to visualize infiltrating CD4 T cells) and anti-Keratin5 (to stain acinar tubules) antibodies. Adjacent lymph node was used as positive control for anti-CD4 immunostaining (n=3).

Data are represented as mean  $\pm$  SEM. Scale bar, 5 $\mu$ m in A and B, 2mm in F and 200 $\mu$ m in H. Significance is indicated as follows: \* = p< 0.05, \*\* = p<0.01, \*\*\* = p<0.001.

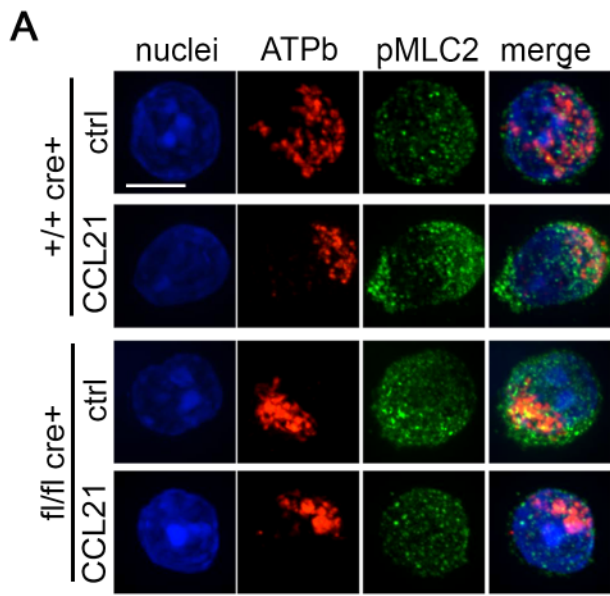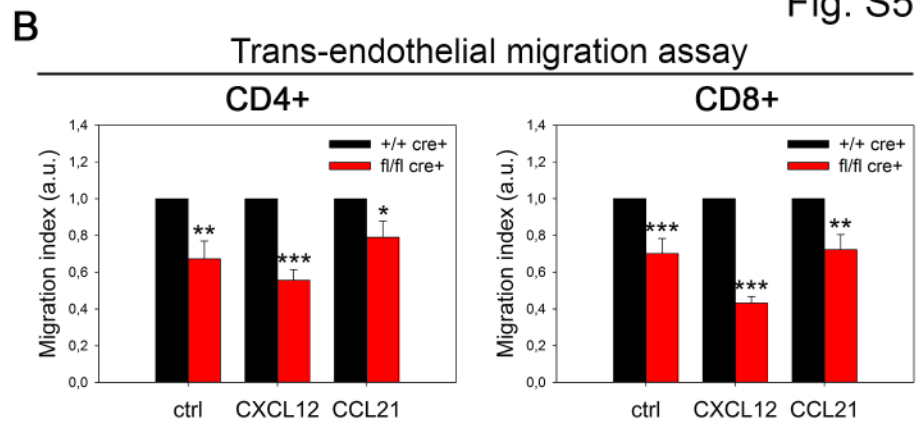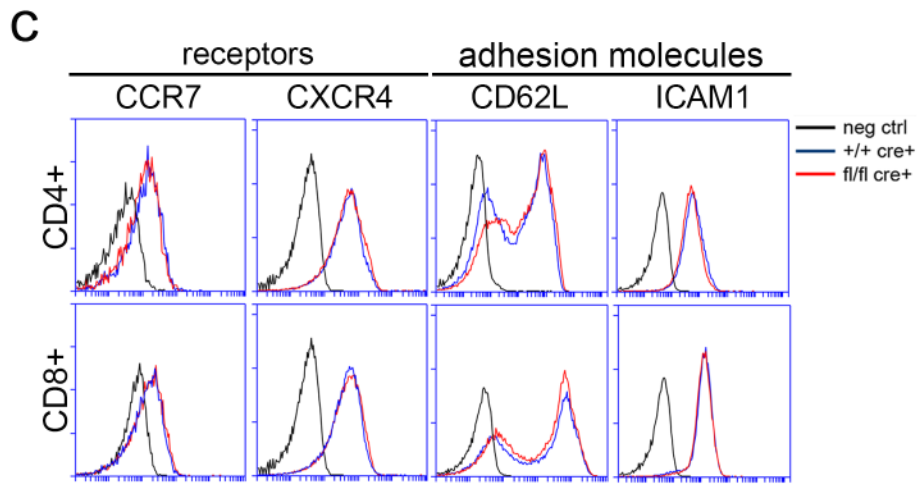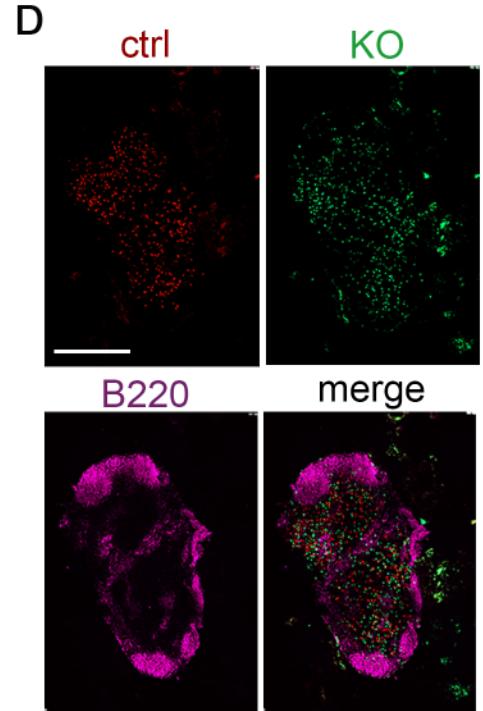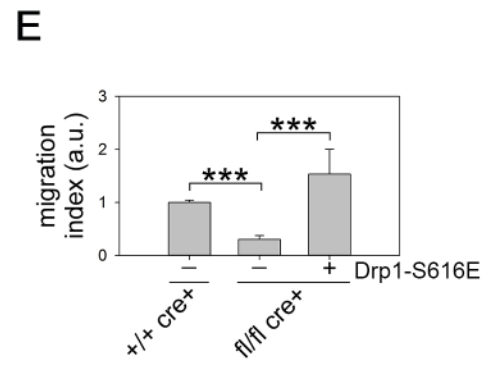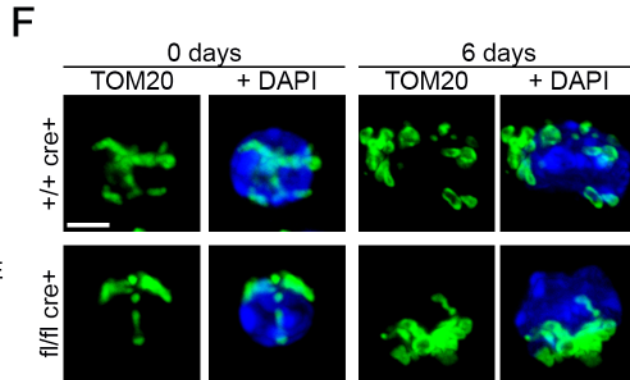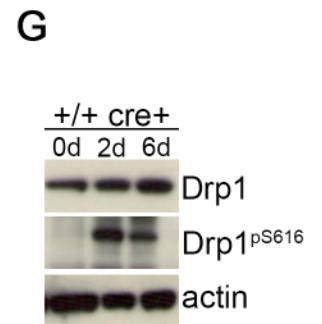

**Supplemental Figure 5. Further analysis of migration and Drp1-dependent fragmentation in mature T cells. Related to Figure 5.**

(A) z-stack reconstruction of confocal images of mitochondria (ATPb, in red) localization and pMLC2 (in green) expression in 6 days *in vitro* activated +/+ cre+ control and fl/fl cre+ Drp1 KO T cells stimulated with 50nM CCL21 (n=3). (B) Transwell migration assay of *in vitro* activated +/+ cre+ control or fl/fl cre+ Drp1 KO T cells, with or without 50nM of CXCL12 or CCL21 in presence of an endothelial monolayer. The number of migrating cells normalized to the control population is reported for both CD4+ and CD8+ T cells in each condition (ctrl, CCL21 n=11; CXCL12, n=5). (C) Cytofluorimetric analysis of the expression levels of CXCR4 and CCR7 receptors, CD62L and ICAM1 adhesion molecules in +/+ cre+ control and fl/fl cre+ Drp1 KO 6 days *in vitro* activated CD4+ and CD8+ T cells (n=7). (D) Intravenous injection of 1:1 *in vitro* activated +/+ cre+ control (eFluor 670-labelled) and fl/fl cre+ Drp1 KO (CFSE-labelled) T cells into WT recipient. After 24h, lymph nodes have been isolated from recipient mice and fixed for immunostaining. Localization of control (eFluor 670) and Drp1 KO (CFSE) T cells inside T (B220-) and B (B220+) cell zones of recipient inguinal lymph node (n=9). (E) +/+ cre+ control and fl/fl cre+ Drp1 KO T cells have been activated 6 days *in vitro* and then electroporated with either empty vector pEYFP-C1 or with pEYFP-C1-Drp1-S616E plasmids (only KO cells). After 24 hours, migration of the cells has been analysed in transwell assays in presence of 50nM CCL21 chemokine for 2 hours (gating on YFP+ cells) (n=6). (F) z-stack reconstructions of mitochondrial morphology (TOM20, in green) in +/+ cre+ control and fl/fl cre+ Drp1 KO T cells immediately after isolation (0 days) and 6 days after activation (6 days) (n=3). (G) Western blot analysis of (phospho)-Drp1 levels in wild type T cells activated *in vitro* 2 days and then expanded for additional 4 days with only IL2 (n=3). Data are represented as mean  $\pm$  SEM. Scale bar 10 $\mu$ m in A, 5  $\mu$ m in F and 500 $\mu$ m in D. Significance is indicated as follows: \* = p< 0.05, \*\* = p<0.01.

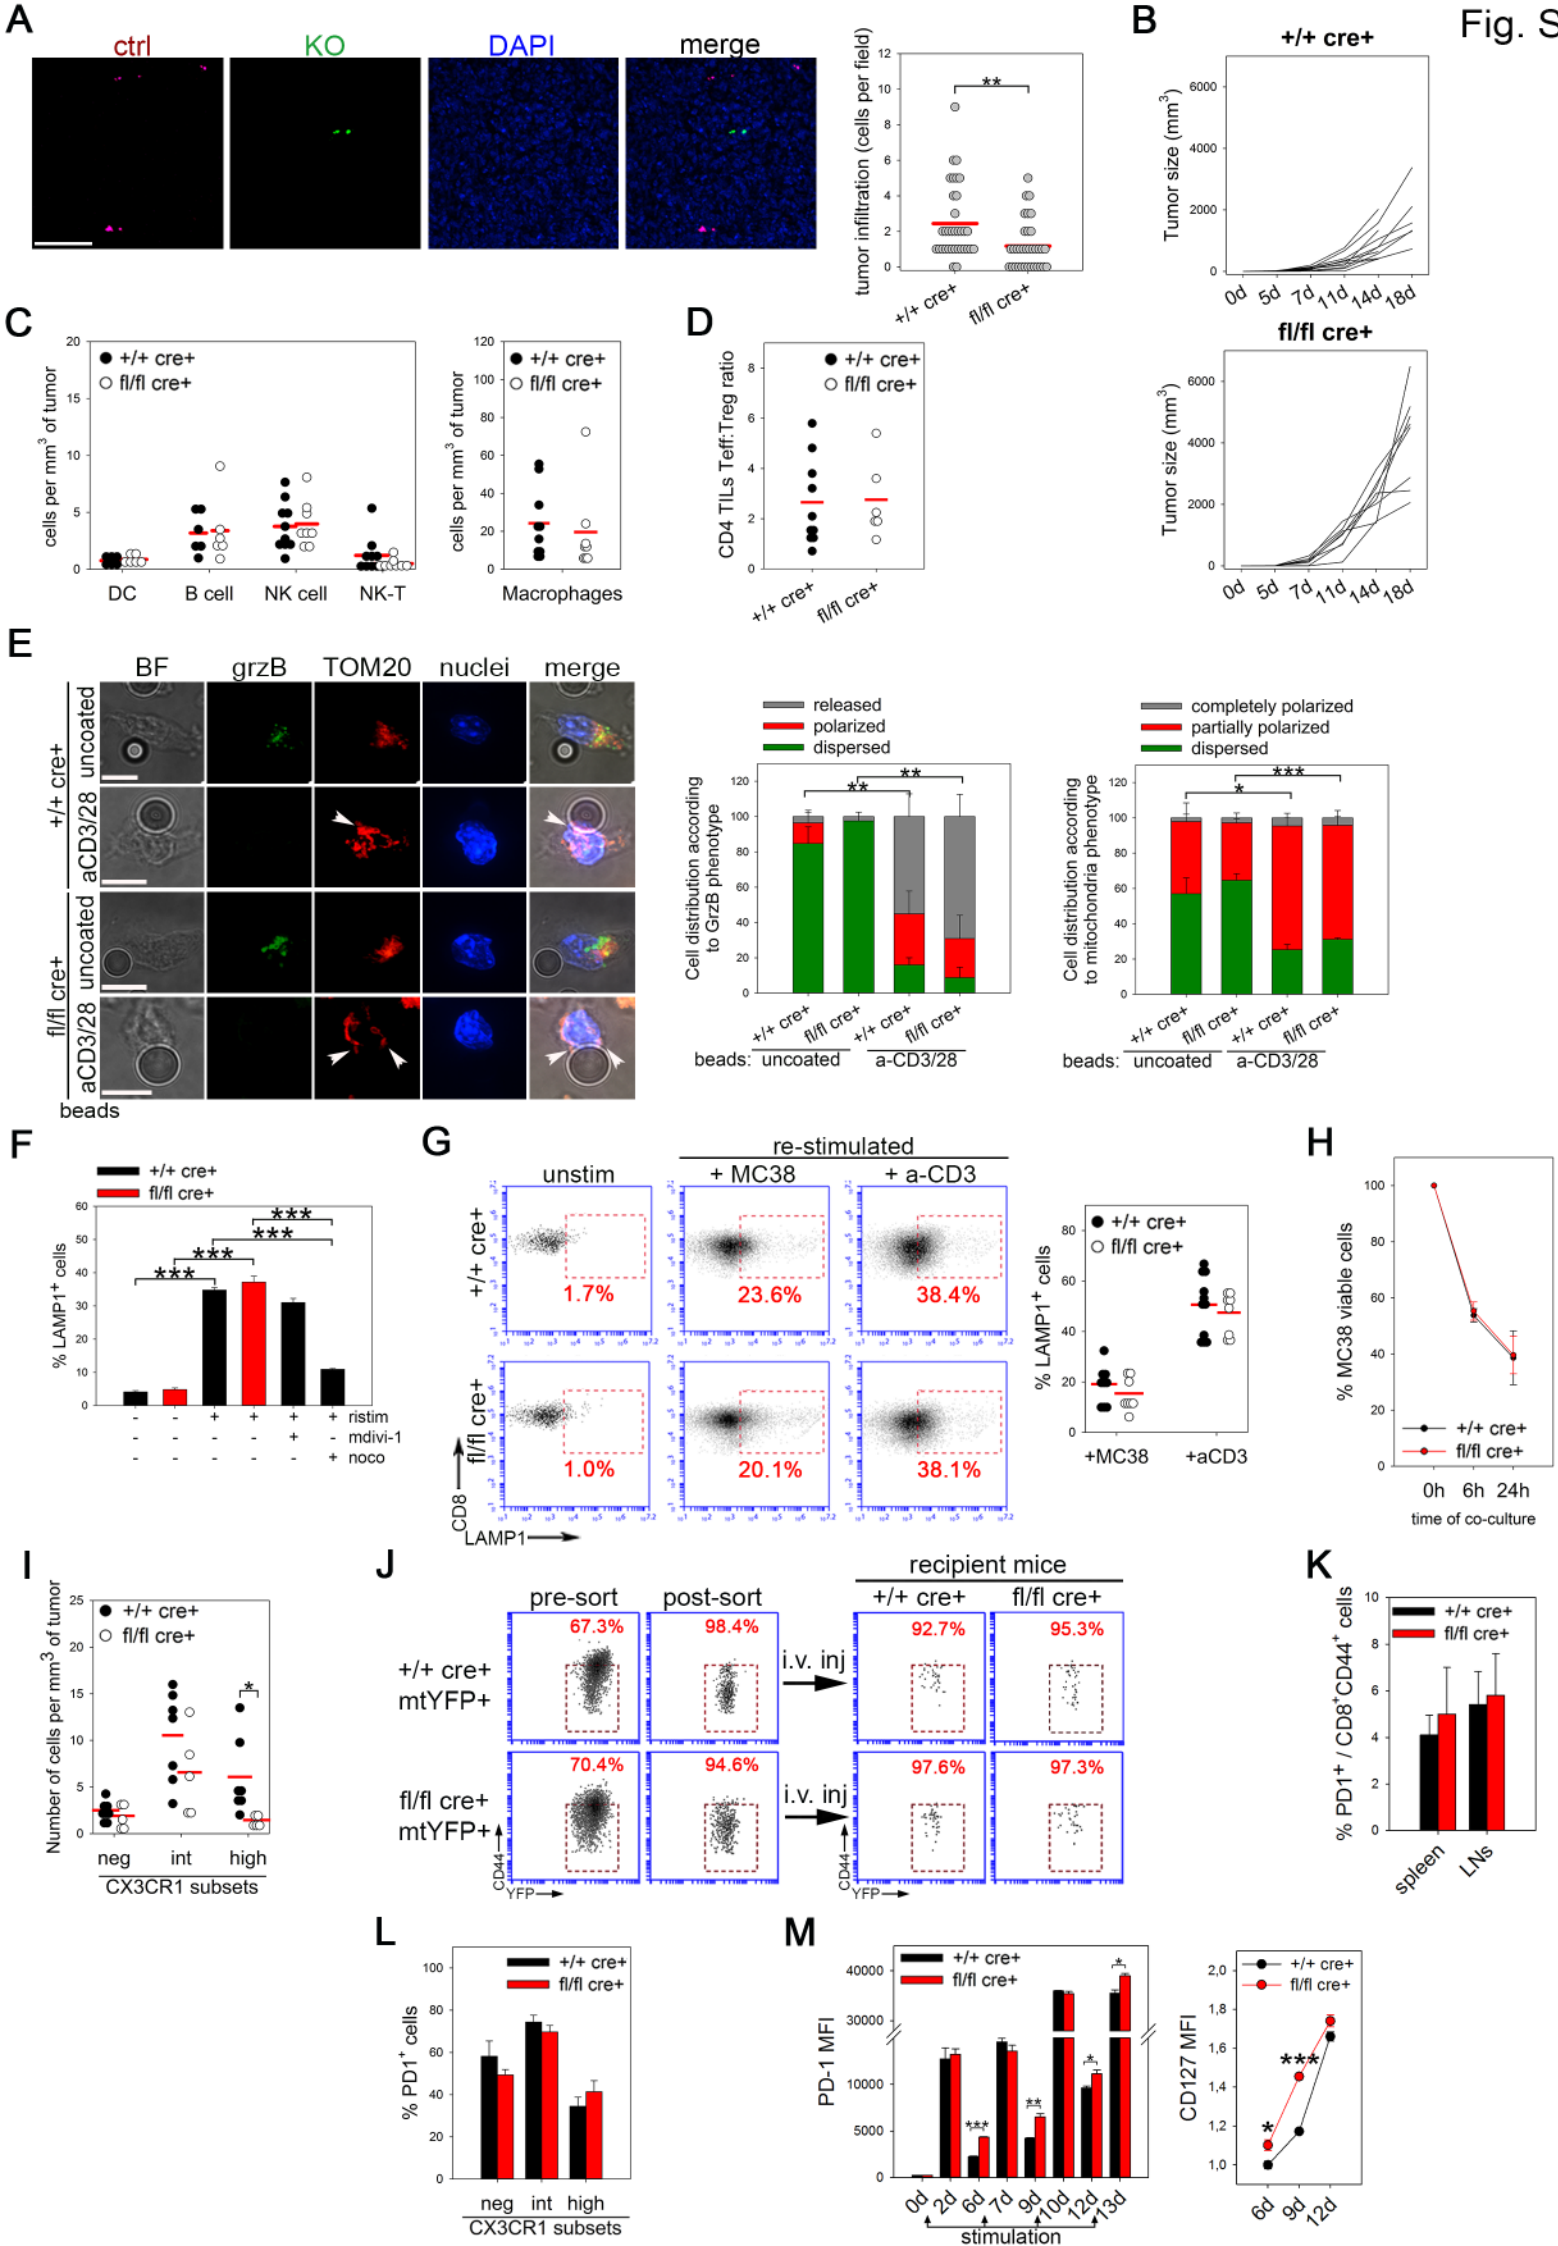

**Supplemental Figure 6. Further analysis of T cells infiltration into MCA38-induced subcutaneous tumors and functional analysis of cytotoxicity in isolated Drp1 KO T cells. Related to Figure 6.**

(A) *In vitro* activated control (eFluor670-labelled) and Drp1 KO (CFSE-labelled) T cells were injected i.v. into WT recipient mice in which MC38-subcutaneous tumors were induced 13days before. After 24 hours tumor masses were collected and the exogenous control and KO TILs' density on tumor slices was quantified by immunofluorescence (H) (Data shown are representative of 1 of 2 independent experiments; 30 fields/mouse analysed at 20x; here, the fluorescence signal shown, corresponding to "control" and "KO" cells, is enhanced through a mask filter used by Volocity software to clearly identify positive cells). (B) Growth curves of MCA38-induced subcutaneous tumor in single *+/+* *cre+* control and *fl/fl cre+* Drp1 conditional KO mice (n=11 ctrl, 8 KO). (C) Number of dendritic cells (DC), B cells (B), natural killer (NK), natural killer-T (NK-T) and macrophages per mm<sup>3</sup> of MC38-derived tumor 18 days after subcutaneous injection (DC, B cells, n=6 ctrl, 6 KO; NK, NK-T, n=10 ctrl, 8 KO). (D) Effector:Regulatory T cell ratio among CD4<sup>+</sup> TILs into MC38-derived tumors 18 days after subcutaneous injection (n=10 ctrl, 6 KO). (E) Mitochondria (TOM20, red) and granzymeB (green) distribution in *+/+* *cre+* control and *fl/fl cre+* Drp1 KO CD8<sup>+</sup> T cells 4h after re-stimulation with uncoated or a-CD3/CD28-coated beads. Arrows indicate point of contact between mitochondrial network coated-beads. Graphs on the right report the distribution of cells according to granzymeB (dispersed, polarized close to the bead, released/absent) or mitochondria morphology (widely dispersed, partially polarized toward the bead (as shown in figure for coated-beads) or completely polarized toward the bead) (n=4). (F) Percentage of LAMP1 positive cells in *+/+* *cre+* control and *fl/fl cre+* Drp1 KO CD8<sup>+</sup> T cells either left unstimulated or re-stimulated for 4 hours with a-CD3/CD28 antibodies, 6d after initial activation (n=4). *+/+* *cre+* control T cells have been also pre-treated for 1h with Drp1 inhibitor mdivi-1 (50μM) or with nocodazole (30μM) (added also during the re-stimulation) (n=4). (G) Splenocytes from MC38-bearing *+/+* *cre+* control and *fl/fl cre+* Drp1 conditional KO CD8<sup>+</sup> mice have been isolated and expanded *in vitro* for 10d with IL2, IL15 and UV-irradiated MC38 cells (last two days without MC38 cells). Then CD8<sup>+</sup> T cells have been magnetically sorted and either left unstimulated or restimulated with a-CD3/CD28 antibodies (+a-CD3) or MC38 cells (+MC38) for 6 hours. Dot plots and the graph on the right report the percentage of LAMP1 positive cells in the different conditions (n=9 ctrl, 8 KO). (H) Viability of MC38 cells 6 or 24 hours after co-culture with *+/+* *cre+* control or *fl/fl cre+* Drp1 KO CD8<sup>+</sup> T cells (obtained as described in G) (n=9 ctrl, 8 KO). (I) Absolute number of *+/+* *cre+* control and *fl/fl cre+* Drp1 KO CD8<sup>+</sup> TILs inside tumor mass distinguished according to CX3CR1 expression (n=8 ctrl, 5 KO). (J) *+/+* *cre+* mtYFP<sup>+/+</sup> control and *fl/fl cre+* mtYFP<sup>+/+</sup> Drp1 KO CD3<sup>+</sup> T cells have been isolated from spleen (pre-sort) and naïve CD44<sup>-</sup> T cells purified with magnetic sorting (post-sort). Then cells have been injected i.v. into *+/+* *cre+* control and *fl/fl cre+* Drp1 conditional KO mice and harvested after 10 days from spleen. The percentage of exogenous mtYFP<sup>+</sup> cells expressing the memory marker CD44 is reported for each condition (n = at least 3 recipient mice for each condition). (K) Percentage of PD-1 positive cells among CD8<sup>+</sup> CD44<sup>+</sup> T cells freshly isolated from spleen and lymph nodes of *+/+* *cre+* control and *fl/fl cre+* Drp1 conditional KO mice (n=3 ctrl, 2 KO). (L) Percentage of PD-1 positive cells among CX3CR1 subsets (negative, intermediate, high) in CD8<sup>+</sup> TILs isolated from MC38-derived tumors 18 days after subcutaneous injection in *+/+* *cre+* control and *fl/fl cre+* Drp1 conditional KO mice (n=6). (M) PD1 and CD127 mean fluorescence index (MFI) in *+/+* *cre+* control and *fl/fl cre+* Drp1 KO T cells isolated from spleen (day 0) and then stimulated *in vitro* at the indicated days (arrows) for 24 hours (only the first stimulation lasted for 48 hours) and left in IL2 for the rest of time (n=3). Data are represented as mean ± SEM in E, F, H, K, L and M and as dot density plot in A, C, D, G and I. Scale bar, 80μm in A and 10μm in E. Significance is indicated as follows: \* = p< 0.05, \*\* = p<0.01, \*\*\* = p<0.001.

**TABLE S1**

| Glycolysis |           |          |          |
|------------|-----------|----------|----------|
| Gene       | baseMean  | Log2(FC) | padj     |
| Aldoa      | 103491,44 | -0,723   | 8,29E-26 |
| Aldob      | 0,475     | 0,027    | NA       |
| Aldoc      | 5183,226  | -0,942   | 8,75E-45 |
| Eno1       | 38419,091 | -0,313   | 9,75E-07 |
| Eno2       | 1724,624  | -0,973   | 3,52E-17 |
| Eno3       | 1342,784  | 0,093    | 0,320762 |
| Gapdh      | 55176,139 | -0,651   | 2,00E-21 |
| Gapdhs     | 26,701    | -0,444   | 0,167964 |
| Gpi1       | 43259,137 | -0,737   | 9,41E-29 |
| Pfkfb1     | 183,959   | 0,555    | 0,000402 |
| Pfkfb2     | 201,167   | -0,179   | 0,310899 |
| Pfkfb3     | 4516,197  | -0,879   | 3,72E-18 |
| Pfkfb4     | 452,366   | -0,206   | 0,081174 |
| Pfkl       | 5780,410  | 0,013    | 0,918526 |
| Pfkm       | 2590,051  | -0,574   | 2,79E-12 |
| Pfkp       | 27964,274 | -0,396   | 5,54E-17 |
| Pgam1      | 3991,382  | -0,506   | 5,65E-15 |
| Pgam2      | 0,217     | -0,022   | NA       |
| Pgk1       | 26915,729 | -0,573   | 3,63E-24 |
| Pkm        | 77359,267 | -0,470   | 1,01E-17 |
| Ppp2ca     | 9023,452  | 0,097    | 0,172421 |
| Ppp2cb     | 1889,221  | 0,197    | 0,006054 |
| Ppp2r1a    | 8891,430  | -0,034   | 0,647369 |
| Ppp2r1b    | 2065,960  | 0,381    | 1,42E-05 |
| Ppp2r5d    | 4135,747  | 0,010    | 0,91745  |
| Tpi1       | 31117,420 | -0,469   | 4,61E-20 |
| Hk1        | 9339,402  | -0,357   | 1,44E-10 |
| Hk2        | 4793,555  | -0,326   | 9,97E-08 |
| Pdk1       | 7305,854  | -0,635   | 8,82E-26 |
| Pdk2       | 236,596   | -0,626   | 5,56E-06 |
| Pdk3       | 2582,943  | -0,172   | 0,013768 |
| Pdk4       | 4,221     | 0,112    | 0,761934 |
| Ldha       | 65638,633 | -0,184   | 0,001483 |
| Ldhb       | 533,809   | -0,098   | 0,423079 |

| Fatty Acid Oxidation |          |          |          |
|----------------------|----------|----------|----------|
| Gene                 | baseMean | Log2(FC) | padj     |
| Eci1                 | 1038,825 | 0,03     | 0,823425 |
| Decr1                | 881,707  | 0,10     | 0,367756 |
| Echs1                | 1859,201 | -0,01    | 0,927409 |
| Hadha                | 4933,294 | -0,09    | 0,175124 |
| Hadhb                | 1491,794 | -0,30    | 0,000204 |
| Hadh                 | 2742,933 | -0,31    | 8,17E-06 |
| Acadl                | 5342,563 | -0,07    | 0,327975 |
| Acadm                | 1491,178 | -0,31    | 1,93E-05 |
| Acads                | 2123,329 | -0,05    | 0,547946 |
| Acavl                | 3572,967 | -0,31    | 1,82E-06 |
| Mut                  | 872,377  | 0,29     | 0,003252 |
| Pcca                 | 1006,590 | 0,33     | 3,17E-05 |
| Pccb                 | 349,317  | 0,28     | 0,024875 |
| Mcee                 | 345,735  | -0,02    | 0,912942 |
| Acaa2                | 1534,607 | -0,11    | 0,161566 |
| Eci2                 | 2353,759 | -0,36    | 9,79E-07 |
| Cpt1c                | 137,377  | -0,27    | 0,17963  |
| Cpt1a                | 1935,454 | -0,11    | 0,15346  |
| Cpt1b                | 16,273   | 0,23     | 0,558289 |
| Cpt2                 | 687,784  | 0,36     | 0,01039  |
| Ehhadh               | 294,505  | 0,11     | 0,478236 |
| Acaa1                | 1838,818 | -0,16    | 0,058221 |
| Acadsb               | 733,305  | -0,32    | 0,003768 |
| Acox1                | 1511,252 | -0,39    | 3,66E-08 |
| Acox3                | 1737,994 | -0,19    | 0,015823 |

| TCA cycle |          |          |          |
|-----------|----------|----------|----------|
| Gene      | baseMean | Log2(FC) | padj     |
| Cs        | 16189,47 | 0,078    | 0,178434 |
| Dlat      | 2280,944 | 0,507    | 7,12E-13 |
| Dld       | 3744,499 | 0,202    | 0,005728 |
| Dlst      | 4465,023 | 0,355    | 1,36E-08 |
| Fh1       | 2897,334 | 0,365    | 5,79E-08 |
| ldh1      | 532,039  | 0,125    | 0,362948 |
| ldh2      | 2445,576 | 0,136    | 0,049929 |
| ldh3a     | 2767,437 | 0,749    | 5,71E-22 |
| ldh3b     | 6058,123 | -0,219   | 0,000505 |
| ldh3g     | 4954,778 | -0,157   | 0,013538 |
| Mdh1      | 9533,532 | 0,061    | 0,331515 |
| Mdh2      | 10750,29 | 0,303    | 1,81E-08 |
| Acly      | 11399,52 | 0,380    | 4,47E-07 |
| Aco1      | 1547,981 | 0,159    | 0,034605 |
| Ogdh      | 6946,745 | 0,426    | 4,88E-11 |
| Aco2      | 11011,63 | 0,384    | 1,47E-09 |
| Pcx       | 1024,123 | -0,194   | 0,082504 |
| Pck1      | 0,388    | -0,065   | NA       |
| Pck2      | 4993,493 | -0,015   | 0,867056 |
| Pdha1     | 7799,495 | 0,057    | 0,44297  |
| Pdha2     | 0,695    | 0,059    | NA       |
| Pdhb      | 2699,068 | 0,122    | 0,133871 |
| Ogdhl     | 11,469   | 0,240    | 0,5383   |
| Sdha      | 8450,051 | 0,090    | 0,180022 |
| Sdhb      | 4991,005 | 0,298    | 2,65E-06 |
| Sdhc      | 3263,892 | 0,210    | 0,001346 |
| Sdhd      | 5005,418 | -0,047   | 0,5762   |
| Suclg2    | 3304,283 | 0,151    | 0,017431 |
| Suclg1    | 1372,262 | 0,456    | 1,61E-08 |
| Sucla2    | 2068,636 | 0,232    | 0,00235  |

| Pentose Phosphate Pathway |          |          |          |
|---------------------------|----------|----------|----------|
| Gene                      | baseMean | Log2(FC) | padj     |
| Fbp1                      | 0,326    | 0,035    | NA       |
| Aldoa                     | 103491,4 | -0,723   | 8,29E-26 |
| Aldob                     | 0,475379 | 0,027    | NA       |
| Rpia                      | 1738,706 | 0,504    | 7,94E-11 |
| Aldoc                     | 5183,226 | -0,942   | 8,75E-45 |
| G6pdx                     | 1905,487 | 0,478    | 1,04E-10 |
| Pgls                      | 1983,66  | 0,068    | 0,452368 |
| Gpi                       | 43259,14 | -0,737   | 9,41E-29 |
| Dera                      | 1311,308 | 0,162    | 0,069359 |
| Pfkl                      | 5780,41  | 0,013    | 0,918526 |
| Pfkm                      | 2590,051 | -0,574   | 2,79E-12 |
| Pfkp                      | 27964,27 | -0,396   | 5,54E-17 |
| Pgd                       | 2973,471 | 0,299    | 6,40E-06 |
| Pgm1                      | 1309,232 | 0,087    | 0,342272 |
| Pgm2                      | 5487,737 | -0,776   | 5,83E-47 |
| Prps1                     | 3075,289 | 0,613    | 2,77E-17 |
| Rpe                       | 2126,647 | 0,052    | 0,674531 |
| Rbks                      | 81,88351 | 0,268    | 0,25233  |
| Taldo1                    | 4123,064 | 0,371    | 2,64E-09 |
| Tkt                       | 20112,71 | 0,144    | 0,008331 |
| Tktl1                     | 0,314299 | 0,043    | NA       |
| H6pd                      | 928,0053 | 0,179    | 0,132816 |

| Fatty Acid Synthesis |          |          |          |
|----------------------|----------|----------|----------|
| Gene                 | baseMean | Log2(FC) | padj     |
| Acs1                 | 402,804  | 0,524    | 8,30E-06 |
| Acs13                | 1585,043 | -0,335   | 0,000155 |
| Acs14                | 6238,057 | 0,073    | 0,352829 |
| Fasn                 | 10487,04 | 0,575    | 1,62E-09 |

|         |          |        |          |
|---------|----------|--------|----------|
| Acsl6   | 259,068  | 0,382  | 0,004425 |
| Acaca   | 1929,027 | 0,530  | 2,43E-09 |
| Acly    | 11399,52 | 0,380  | 4,47E-07 |
| Acsl5   | 8223,055 | 0,320  | 1,80E-05 |
| Elovl2  | 0,217275 | -0,022 | NA       |
| Elovl5  | 5620,83  | -0,223 | 0,00049  |
| Elovl1  | 2254,533 | 0,206  | 0,004595 |
| Slc25a1 | 3386,888 | 0,066  | 0,449895 |
| Elovl4  | 46,28493 | 0,268  | 0,364521 |
| Elovl6  | 2086,301 | 0,098  | 0,294691 |
| Elovl7  | 175,5459 | -0,184 | 0,298221 |
| Elovl3  | 0,217275 | -0,022 | NA       |
| Tecr    | 5379,159 | -0,008 | 0,926046 |

|          |          |        |          |
|----------|----------|--------|----------|
| Ndufa4   | 2960,172 | 0,430  | 3,64E-09 |
| Ndufa5   | 685,976  | 0,510  | 5,59E-06 |
| Ndufa6   | 3225,860 | -0,476 | 9,77E-11 |
| Ndufa7   | 2388,900 | 0,086  | 0,335355 |
| Ndufa8   | 1896,458 | 0,180  | 0,031362 |
| Ndufa9   | 3370,989 | 0,142  | 0,033198 |
| Ndufa10  | 3844,788 | 0,167  | 0,013211 |
| Ndufab1  | 1324,281 | 0,165  | 0,065138 |
| Ndufb2   | 446,510  | 0,090  | 0,524516 |
| Ndufb3   | 1496,502 | 0,159  | 0,087788 |
| Ndufb4   | 174,510  | -0,017 | 0,940166 |
| Ndufb5   | 3144,335 | -0,053 | 0,562127 |
| Ndufb6   | 1768,196 | 0,282  | 7,65E-05 |
| Ndufb7   | 2296,584 | 0,201  | 0,017199 |
| Ndufb8   | 1972,416 | 0,284  | 7,12E-05 |
| Ndufb9   | 2163,668 | 0,145  | 0,077446 |
| Ndufb10  | 2013,452 | 0,005  | 0,963281 |
| Ndufc1   | 813,532  | 0,220  | 0,014329 |
| Ndufc2   | 2077,259 | 0,196  | 0,005062 |
| Ndufs1   | 3301,934 | 0,254  | 5,53E-05 |
| Ndufs2   | 5345,807 | -0,067 | 0,365521 |
| Ndufs3   | 1842,350 | -0,231 | 0,010045 |
| Ndufv1   | 3085,312 | 0,300  | 1,13E-05 |
| Ndufs4   | 1832,786 | -0,107 | 0,169394 |
| Ndufs5   | 364,942  | 0,378  | 0,00283  |
| Ndufs6   | 1536,132 | 0,274  | 0,003365 |
| Ndufs8   | 2133,126 | 0,152  | 0,070945 |
| Ndufv2   | 3461,655 | 0,000  | 0,998692 |
| Ndufv3   | 4133,567 | -0,719 | 1,46E-15 |
| Atp12a   | 0,444    | 0,081  | NA       |
| Atp4a    | 31,033   | -0,297 | 0,356811 |
| Atp5a1   | 28843,98 | 0,274  | 3,95E-07 |
| Atp5b    | 44431,05 | 0,296  | 3,87E-08 |
| Atp6v0a4 | 0,161    | -0,022 | NA       |
| Atp5c1   | 11085,92 | -0,095 | 0,118576 |
| Atp5d    | 8878,947 | -0,123 | 0,089551 |
| Atp6v1d  | 1990,617 | -0,325 | 0,000127 |
| Atp5e    | 3896,595 | -0,086 | 0,306654 |
| Atp5f1   | 8265,778 | 0,142  | 0,033687 |
| Atp6v1h  | 1735,166 | -0,048 | 0,637174 |
| Atp5g2   | 1213,286 | -0,062 | 0,567009 |
| Atp5g3   | 6633,098 | 0,384  | 6,30E-11 |
| Atp5j    | 3731,915 | 0,464  | 6,86E-12 |
| Atp6v1a  | 4688,973 | 0,009  | 0,929678 |
| Atp6v1b1 | 0,957    | -0,091 | NA       |
| Atp6v1b2 | 2826,001 | -0,080 | 0,300557 |
| Atp6v1c1 | 1403,512 | 0,228  | 0,004893 |
| Atp6v1e1 | 1761,911 | 0,028  | 0,775319 |
| Atp6v0b  | 1814,302 | -0,330 | 0,000318 |
| Atp6v1g2 | 238,867  | -0,210 | 0,158356 |
| Atp6v0a1 | 836,167  | -0,052 | 0,650468 |
| Atp5o    | 4406,529 | 0,065  | 0,365542 |
| Ppa1     | 2741,897 | 0,852  | 1,91E-22 |
| Ndufa4l2 | 1,698    | -0,039 | NA       |
| Sdha     | 8450,051 | 0,090  | 0,180022 |
| Sdha     | 4991,005 | 0,298  | 2,65E-06 |
| Sdhc     | 3263,892 | 0,210  | 0,001346 |
| Sdhd     | 5005,418 | -0,047 | 0,5762   |
| Lhpp     | 201,855  | 0,338  | 0,035831 |
| Uqcrb    | 1843,160 | 0,177  | 0,038531 |
| Uqcrc1   | 6231,243 | 0,381  | 7,19E-11 |
| Uqcrc2   | 9614,012 | 0,075  | 0,240748 |
| Uqcrcf1  | 3973,641 | 0,147  | 0,028167 |
| Cox4i2   | 33,026   | -1,445 | 8,48E-08 |
| Atp6v0e  | 2408,840 | -0,361 | 6,14E-06 |
| Atp6v0d1 | 1908,879 | -0,256 | 0,000316 |
| Cox7a2l  | 4357,751 | -0,474 | 4,64E-10 |
| Atp6v1f  | 1932,605 | -0,049 | 0,618655 |
| Cox5a    | 5347,093 | 0,266  | 1,71E-05 |

| OXPHOS   |          |          |          |
|----------|----------|----------|----------|
| Gene     | baseMean | Log2(FC) | padj     |
| Cox17    | 1964,352 | -0,068   | 0,505579 |
| Tcirg1   | 3345,265 | -0,315   | 0,000363 |
| Atp5h    | 4378,264 | -0,046   | 0,618091 |
| Atp5l    | 25,313   | -0,317   | 0,349105 |
| Uqcr11   | 1028,659 | 0,432    | 8,48E-08 |
| Cox6b2   | 4434,789 | 0,052    | 0,576087 |
| Cox6b1   | 1005,278 | -0,042   | 0,708435 |
| Ndufa11  | 1169,968 | 0,125    | 0,180214 |
| Atp6v1g3 | 1,503    | 0,093    | NA       |
| Cox4i1   | 8452,615 | -0,007   | 0,932118 |
| Cox5b    | 2335,219 | 0,277    | 7,96E-05 |
| Cox6a1   | 4974,910 | 0,098    | 0,221445 |
| Cox6a2   | 66,277   | -0,546   | 0,017437 |
| Cox6c    | 3523,931 | 0,067    | 0,350515 |
| Cox7a1   | 58,916   | -0,591   | 0,012521 |
| Cox7a2   | 3897,642 | 0,021    | 0,821056 |
| Cox7b    | 4188,318 | 0,143    | 0,038435 |
| Cox7c    | 2373,819 | -0,111   | 0,142367 |
| Cox8a    | 6971,659 | 0,144    | 0,094239 |
| Cox10    | 954,024  | 0,455    | 1,06E-06 |
| Cox11    | 341,977  | 0,060    | 0,716475 |
| Cox15    | 1979,146 | 0,366    | 5,18E-06 |
| Cyc1     | 4224,080 | 0,395    | 3,39E-10 |
| Atp6v0e2 | 8,647    | 0,023    | 0,96075  |
| Atp6v0d2 | 47,649   | -0,627   | 0,017431 |
| Atp6v0c  | 407,467  | 0,049    | 0,744093 |
| Atp6v0a2 | 2736,286 | -0,034   | 0,681515 |
| Ppa2     | 1075,047 | 0,484    | 6,73E-09 |
| Uqcrq    | 3098,858 | 0,363    | 2,69E-08 |
| Uqcr10   | 2889,556 | 0,229    | 0,001124 |
| Ndufs7   | 1940,704 | 0,240    | 0,000967 |
| Atp5g1   | 1377,818 | 0,340    | 0,000201 |
| Uqcrh    | 5986,371 | -0,413   | 2,07E-10 |
| Atp6ap1  | 2559,384 | -0,203   | 0,002009 |
| Atp6ap2  | 1723,958 | 0,074    | 0,486746 |
| Atp8a1   | 963,584  | 0,015    | 0,905345 |
| Atp8a2   | 4,578    | -0,075   | 0,852361 |
| Atp8b1   | 3,840    | 0,339    | 0,269039 |
| Atp8b2   | 4088,716 | -0,073   | 0,352986 |
| Atp8b3   | 4,099    | 0,251    | 0,454583 |
| Atp8b4   | 2570,883 | 0,504    | 1,60E-09 |
| Atp8b5   | 1,370    | 0,287    | NA       |
| mt-Cytb  | 22221,01 | 0,823    | 1,32E-18 |
| mt-Nd1   | 33925,56 | 0,681    | 2,16E-14 |
| mt-Nd2   | 17186,5  | 0,831    | 5,51E-26 |
| mt-Nd3   | 0,312617 | -0,007   | NA       |
| mt-Nd4   | 12136,11 | 1,019    | 1,97E-34 |
| mt-Nd5   | 32034,17 | 0,505    | 3,19E-13 |
| mt-Nd6   | 478,9847 | -0,118   | 0,518287 |
| Ndufa1   | 1230,159 | 0,078    | 0,431752 |
| Ndufa2   | 1872,867 | 0,024    | 0,827937 |
| Ndufa3   | 1843,684 | -0,064   | 0,519346 |

|          |          |        |          |
|----------|----------|--------|----------|
| Atp6v1g1 | 1220,312 | -0,160 | 0,072462 |
| Atp5j2   | 3705,844 | -0,008 | 0,936343 |

| cMyc-dependent metabolic genes |                |           |          |          |
|--------------------------------|----------------|-----------|----------|----------|
| Gene                           | pathway        | BaseMean  | Log2(FC) | padj     |
| Slc38a1                        | Glutaminolysis | 7157,442  | 0,169    | 0,02914  |
| GOT1                           | Glutaminolysis | 4559,558  | 0,118    | 0,06312  |
| GOT2                           | Glutaminolysis | 4487,491  | 0,232    | 0,00020  |
| PPAT                           | Glutaminolysis | 2841,507  | 0,467    | 9,13E-09 |
| GPT                            | Glutaminolysis | 210,335   | -0,040   | 0,84721  |
| Gls2                           | Glutaminolysis | 825,873   | -0,754   | 2,92E-11 |
| Gls                            | Glutaminolysis | 6436,671  | -0,103   | 0,31407  |
| Slc1a5                         | Glutaminolysis | 9791,542  | 0,400    | 6,79E-06 |
| ME2                            | Glutaminolysis | 4147,997  | -0,238   | 0,00096  |
| slc3a2                         | Glutaminolysis | 10778,388 | -0,020   | 0,82153  |
| slc7a5                         | Glutaminolysis | 12075,357 | 0,389    | 2,05E-07 |
| Slc16a1                        | Glycolysis     | 3898,558  | 0,299    | 4,00E-05 |
| Slc2a3                         | Glycolysis     | 24963,571 | -1,186   | 1,88E-73 |
| Glud1                          | Glycolysis     | 9749,808  | -0,065   | 0,32978  |
| LDhb                           | Glycolysis     | 533,809   | -0,098   | 0,42307  |
| Eno1                           | Glycolysis     | 38419,091 | -0,313   | 9,75E-07 |
| Slc16a3                        | Glycolysis     | 6134,605  | -0,573   | 9,17E-19 |
| PGK1                           | Glycolysis     | 26915,729 | -0,573   | 3,63E-24 |
| GPI                            | Glycolysis     | 43259,137 | -0,737   | 9,41E-29 |
| Pgam1                          | Glycolysis     | 3991,382  | -0,506   | 5,65E-15 |
| Slc2a1                         | Glycolysis     | 5610,559  | -0,858   | 1,04E-22 |
| Gpd1l                          | Glycolysis     | 1237,190  | 0,517    | 1,70E-10 |
| Pfkl                           | Glycolysis     | 5780,410  | 0,013    | 0,91852  |
| HK2                            | Glycolysis     | 4793,555  | -0,326   | 9,97E-08 |
| LDHa                           | Glycolysis     | 65638,633 | -0,184   | 0,00148  |
| Aldoa                          | Glycolysis     | 103491,44 | -0,723   | 8,29E-26 |
| Tpi                            | Glycolysis     | 31117,420 | -0,469   | 4,61E-20 |
| Pfkfb3                         | Glycolysis     | 4516,197  | -0,879   | 3,72E-18 |
| Pkm                            | Glycolysis     | 77359,267 | -0,470   | 1,01E-17 |
| Aldh18A1                       | Polyamine      | 7555,299  | 0,276    | 3,62E-06 |
| Sms                            | Polyamine      | 1863,269  | 0,217    | 0,004338 |
| Odc1                           | Polyamine      | 9807,048  | 0,369    | 1,41E-10 |
| Prodh                          | Polyamine      | 102,935   | 0,990    | 2,16E-07 |
| GFPT1                          | Polyamine      | 5190,251  | -0,181   | 0,004291 |
| OAT                            | Polyamine      | 3385,538  | 0,121    | 0,09745  |
| Srm                            | Polyamine      | 3159,278  | 0,911    | 1,96E-25 |
| TKT                            | PPP            | 20112,705 | 0,144    | 0,008331 |
| G6PDx                          | PPP            | 1905,487  | 0,478    | 1,04E-10 |
| IDH3a                          | TCA            | 2767,437  | 0,749    | 5,71E-22 |
| IDH3b                          | TCA            | 6058,123  | -0,219   | 0,000505 |
| IDH3g                          | TCA            | 4954,778  | -0,157   | 0,013538 |
| SDHc                           | TCA            | 3263,892  | 0,210    | 0,001346 |
| SDHd                           | TCA            | 5005,418  | -0,047   | 0,5762   |
| PDHx                           | TCA            | 551,803   | 0,447    | 3,69E-06 |
| Dlat                           | TCA            | 2280,944  | 0,507    | 7,12E-13 |
| MDH2                           | TCA            | 10750,290 | 0,303    | 1,81E-08 |
| Arg1                           | Ureacycle      | 2,149     | -0,012   | NA       |
| Arg2                           | Ureacycle      | 3,000     | -0,050   | NA       |
| Nos1                           | Ureacycle      | 6,412     | 0,464    | 0,156246 |
| Nos2                           | Ureacycle      | 340,431   | -1,392   | 3,32E-22 |

**Table S1. Raw data from RNaseq analysis of control and Drp1 KO T cells. Related to Figure 3 and Supplemental Figure 3.**

Raw data from RNaseq analysis of the genes reported in Fig. 3F-G and S3E. For each gene the following data are reported: mean count value between KO and control (3 samples each) (Base Mean); logarithmic value of the Fold Change between the mean value of KO and controls (Log2FoldChange); adjusted p-value (padj).
